# Supplementary material for: Growth of Coal Mining Operations in the Elk River Valley (Canada) Linked to Increasing Solute Transport of Se, NO3–, and SO42– into the Transboundary Koocanusa Reservoir (USA–Canada)
Source: PubMed Central journal article supplement (PMC10653222; doi:10.1021/acs.est.3c05090), 2023-11-03
Supplement: es3c05090_si_001.pdf [file es3c05090_si_001.pdf]

1  
2  
3  
4  
5  
6  
7  
8  
9  
10  
11  
12  
13  
14  
15  
16

**Supporting Information for:**

Growth of coal mining operations in the Elk River Valley (B.C. Canada) linked to increasing solute transport of Se, NO<sub>3</sub><sup>-</sup>, and SO<sub>4</sub><sup>2-</sup> into the transboundary Koochanusa Reservoir (USA-Canada)

Meryl B. Storb<sup>1,3\*</sup>, Ashley M. Bussell<sup>1</sup>, Sara L. Caldwell Eldridge<sup>1</sup>, Robert M. Hirsch<sup>2</sup>, Travis S. Schmidt<sup>1</sup>

1. U.S. Geological Survey WY- MT Water Science Center, 3162 Bozeman Avenue, Helena MT 59601

2. U.S. Geological Survey Water Mission Area, 12201 Sunrise Valley Dr, Reston, VA 20192

3. Department of Land Resources and Environmental Sciences, Montana State University, Bozeman, Montana, USA

Journal: Environmental Science and Technology  
Prepared June 2023  
29 pp. in length, including text, 5 tables and 13 figures.

17 *Methods*

18 *SI Geospatial Analysis for Mine Area*

19 Total area of disturbance (waste rock deposits) was estimated using remote sensing and  
20 geospatial analysis techniques (SI Figure 1). Specifically, Sentinel 2 data <sup>1</sup> for August, 2022 were  
21 mosaicked and composited for the Elk River Watershed using Google Earth Engine. <sup>2</sup> A function  
22 to mask clouds from the image using bands 10 and 11 was applied and pixel values for all images  
23 included in the composite were reduced to the median value for each band. Random forest  
24 classification was then done on the composite image. <sup>3</sup> The classification model was trained with  
25 ten trees using the training classes and associated sample sizes shown in table SI 1a. Fifty percent  
26 of the training data were held out for validation for each tree. Total mean error from validation on  
27 holdout sites was 12.7%. The classified image was then imported to ArcPro<sup>4</sup> for postprocessing.  
28 The image was converted to a multipart polygon using the conversion tools. Next, the Region  
29 Group tool was used to eliminate polygons less than 5,000 square meters, as these small polygons  
30 likely represented misclassified pixels rather than actual landcover features. Additionally, because  
31 the objective of this exercise was to extract the perimeter of the waste rock area, small polygons  
32 located within the waste rock polygons associated with a class other than waste rock were  
33 eliminated on the assumption that while the surface reflectance in the imagery might indicate the  
34 presence of another landcover (e.g., water or vegetation) it is likely still underlain by waste rock.  
35 The final areas of waste rock are shown in table SI 1b.

36

37 *Additional site information*

38 The Kootenay River near Fenwick Station (BC08NG0009) is 13 km downstream of the Fort  
39 Steele discharge station (08NG065) and downstream of the confluence with the Saint Mary's  
40 River, but upstream of the confluence with the Bull River (Figure 1). <sup>5</sup> Sample collection at this

41 site was discontinued in September 2019. The mean daily discharge for the Kootenay at Fort Steele  
42 (WSC site 08NG065) between 1963 and 2022 was  $148 \text{ m}^3\text{sec}^{-1}$ .<sup>5</sup> Because the discharge and water  
43 sampling locations are not concurrent, flow was corrected by the difference in contributing area  
44 between the two sites, meaning flow at the Fort Steele location was increased by 2.82% to estimate  
45 flows at the Fenwick location. Adjusted flows for the Fenwick site are available in Lange and  
46 Storb<sup>6</sup>

47 There is a historical Water Survey of Canada (WSC) site the Elk River at Phillips Bridge  
48 (08NK005), 6.7 km upstream of the Highway 93 sampling location<sup>5</sup>. Flow at Phillips Bridge was  
49 measured from 1924-1996. The closest flow measurement location that is currently in operation is  
50 the WSC Elk River at Fernie site (08NK002). Thus, Move2 streamflow record extension  
51 techniques<sup>7, 8</sup> were implemented in R<sup>55</sup> using the smwrStats package<sup>9</sup> to extend the daily flow  
52 record at Phillips Bridge, based on the flow relationship between the two sites post 1970  
53 (Correlation coefficient 0.9805). Once the record extension was complete, an area correction factor  
54 was applied to account for the difference in contributing area between the Phillips Bridge and the  
55 Highway 93 sampling location, flows from Phillips Bridge were increased by 0.49%. Adjusted  
56 flows for the Highway 93 site are available in Lange and Storb<sup>6</sup>

57

## 58 *Geology*

59 The Elk and Kootenay Watersheds are both contained within the Canadian Cordillera and  
60 bisected by faults that run north to south. In both watersheds faults have generated the valley  
61 bottoms where their respective rivers are present, however the bedrock geologies are different.<sup>10</sup>  
62 The Upper Kootenay Watershed is generally comprised of carbonate and silicate geology, the  
63 eastern side is primarily limestones and dolomites, and the western side is dominated by carbonate

64 and siliciclastic formations. The Kootenay River overlays quaternary alluvium, and the riverbed  
65 mirrors the Rocky Mountain Trench fault <sup>10</sup>. The Elk River Watershed generally runs north to  
66 south, with the Elk River overlaying a quaternary alluvial aquifer and mirrors the Bourgeau thrust  
67 fault from its northern extent to the town of Fernie. The Elk Valley contains two of the three,  
68 structurally separate, major coalfields in British Columbia (B.C.) <sup>11</sup>. Mining in the Elk River  
69 Watershed is focused on bituminous coal from the Mist Mountain Formation which is part of the  
70 Jurassic-Cretaceous Kootenay Group (deposited 150-130 M years ago; 450-550 m thick) and is  
71 underlain by limestone bedrock, which has high karst potential in some areas <sup>12, 13</sup>.

72 Coal has been mined in the Elk River Watershed since 1897, with large-scale mining in the  
73 valley beginning in the 1970's with the transition to open pit drill and blast methods <sup>14</sup>. The  
74 Kootenay River Watershed is also home to mining operations, including a smelter and several  
75 gypsum and silica mines. Several metal explorations are also occurring <sup>10</sup> and the Sullivan Metal  
76 Mine (operated by Teck Resources for Pb, Zn and silver (Ag) production) near the town of  
77 Kimberly operated for almost a century, but closed in 2001. <sup>15</sup>

## 78 *Analysis methods*

### 79 *WRTDS Model Governing Equation*

80 The Weighted Regression on Time Discharge and Seasons (WRTDS) model is based on using  
81 statistical smoothing by partitioning the variation present in constituent concentration values into  
82 three components and an error term. The four components are related to season within the year,  
83 the watershed hydrologic condition or discharge component, long-term trend, and the random  
84 unexplained portion of the variation <sup>16</sup>. The basic form of the underlying WRTDS model is below,  
85 where  $c$  is concentration;  $Q$  is discharge;  $t$  is time in years; and  $\varepsilon$  is unexplained variation:

$$86 \quad \ln(c) = \beta_0 + \beta_1 t + \beta_2 \ln(Q) + \beta_3 \sin(2\pi t) + \beta_4 \cos(2\pi t) + \varepsilon \quad (1)$$

87 The equation is a weighted regression and is fit in the form of a weighted Tobit model (i.e.,  
88 survival regression). The model accommodates the incorporation of non-detect data because each  
89 concentration value can be expressed as a single number for a data point with a detection or as an  
90 interval between 0 and the reporting limit for non-detect values <sup>17, 18</sup>.

91 Likelihoods were determined from 250 bootstrap intervals assuming stationary flow  
92 normalization.

93

#### 94 *Kalman*

95 Performance of WRTDS\_Kalman<sup>19</sup> depends on the AR1 coefficient ( $\rho$ ), and that relationship  
96 varies with constituents and sampling scenarios. The default for  $\rho$  within the WRTDS\_Kalman  
97 function is 0.9 <sup>19, 20</sup>. This was utilized for selenium and sulfate after exploration of larger and  
98 smaller  $\rho$  values (0.85 and 0.95) did not generate estimates that were substantially different (<5%),  
99  $\rho = 0.95$  was used for nitrate for WRTDS\_Kalman<sup>19</sup> estimates for both rivers following results  
100 presented in Zhang and Hirsch<sup>19</sup>.

#### 101 *Exceedance probability*

102 One way of describing the trends in Se concentrations over the period of record is to use  
103 estimates of the expected number days in each year when Se concentrations exceeded the water  
104 quality criteria. These calculations are made by using the WRTDS model of Se for the Elk River.  
105 For each day of the 38-year long record<sup>6</sup> the WRTDS model provides an estimate of conditional  
106 mean and standard deviation of the natural log of concentration for that day (conditioned on year,  
107 time of year, and discharge). Using the observed residuals from the fitted WRTDS model as a  
108 representation of the probability distribution of the standardized residual for each day, we  
109 estimate, for each day in the period of record, the probability of exceedance of the criteria. The

110 expected number of days that concentration exceeded the criteria is simply the sum of the  
111 probabilities for all days in the year.

112 The approach to calculating the expected number of days on which the Se concentrations exceed  
113 a specified criterion is based on the estimated WRTDS model and the discharge record.

114

115 Let  $x_i$  = the concentration on day  $i$ ,

116  $y_i = \ln(x)_i$

117  $\bar{y}_i$  = the estimated conditional mean of  $y_i$  from the WRTDS model

118  $s_i$  = the standard deviation of the distribution of  $y_i$  from the WRTDS model

119

120 where  $i$  is the index of all 14,004 days in sequence, starting with 1984-07-10 and ending with  
121 2022-11-11.

122

123 We can express the value of  $y_i$  on any given day as:

124

125  $y_i = \bar{y}_i + s_i \cdot e_i$

126

127 The  $e_i$  values are standardized residuals, computed from the WRTDS model and the data set of  
128 774 observed concentrations. They are computed as:

129

130  $e_j = \frac{y_j - \bar{y}_j}{s_j}$  for  $j = 1, 2, \dots, 774$

131

132 The subscript  $j$  here refers to the sequence number of sample values, (1 to 774).

133

134 Rather than using some theoretical distribution (such as gaussian) for these standardized  
135 residuals we use the population of observed standardized residuals from the data set.<sup>6</sup> In the case

136 considered here, the Elk River Se data, we have 774 observations and hence 774 observed

137 standardized residuals (these are a set of jack-knife cross-validation estimates computed in the  
 138 modelEstimation() function in EGRET).<sup>18</sup> It is assumed here that each of these 774 residuals is  
 139 equally likely to have occurred on any given day in the 14,004-day record.

140  
 141 For purposes of estimation of the probability of exceedance of the water quality criterion,  
 142 denoted here as  $x^*$ . The natural log of the criterion is denoted as  $y^* = \ln(x^*)$ .

143  
 144 For each day in the period of record ( $i = 1, 2, \dots, 14004$ ) we compute 774 equally likely  
 145 outcomes one for each sampled day ( $j = 1, 2, \dots, 774$ ). Those 10,839,096  
 146 ( $= 14004 \cdot 774$ ) outcomes are denoted  $V_{i,j}$  and they are computed as:

$$V_{i,j} = \begin{cases} 1 & \text{if } \bar{y}_i + s_i \cdot e_j \geq y^* \\ 0 & \text{if } \bar{y}_i + s_i \cdot e_j < y^* \end{cases}$$

147  
 148  
 149  
 150 Then the estimated probability that concentration on day  $i$  exceeds the criterion  $x^*$  is defined as  
 151

$$p_i = \frac{\sum_{j=1}^{774} V_{i,j}}{774} \quad \text{for } i = 1, 2, \dots, 14004$$

152  
 153  
 154 We can then compute the expected number of exceedances for each water year in the record as  
 155  $z_k = \sum_{i \in U_k} p_i$

156  
 157 Where,  $i \in U_k$  denotes the set of all days,  $i$ , in year  $k$ .

158  
 159 The  $z_k$  represent the expected number of days of exceedances in year  $k$  and can take on any  
 160 value from 0 to 365 (or 366 in a leap year).

161

162

163 Any use of trade, firm, or product names is for descriptive purposes only and does not imply  
164 endorsement by the U.S. Government.

165



166 SI Figure 1  
167 Total area of mine disturbance (waste rock deposits) based on GIS analysis of aerial imagery.

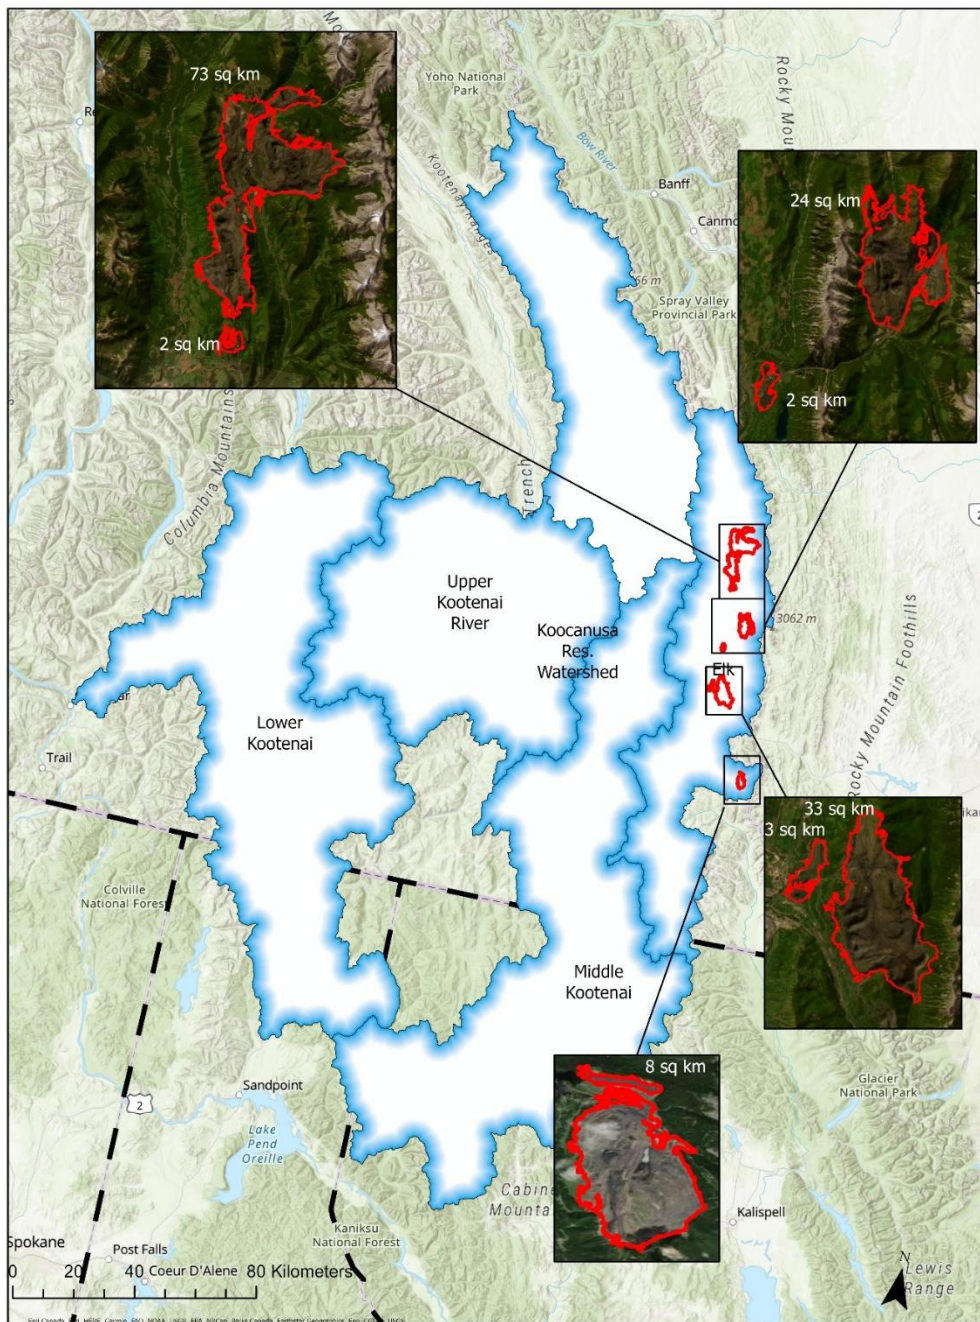

168

169

170 SI Table 1a

171 Training classes and associated sample sizes from the GIS analysis of mine waste rock area

| Sample size (n) | Class      |
|-----------------|------------|
| 228             | Waste rock |
| 89              | Forest     |
| 68              | Water      |
| 81              | Open rock  |
| 60              | Deforested |

172

173 SI Table 1b

174 Final areas of waste rock from GIS analysis.

| Mine                                         | Area of disturbance, in square kilometers |
|----------------------------------------------|-------------------------------------------|
| Fording River Operations                     | 75 km <sup>2</sup>                        |
| Line Creek Operations                        | 26 km <sup>2</sup>                        |
| Elkview Operations                           | 36 km <sup>2</sup>                        |
| Coal Mountain Operations (in closure period) | 8 km <sup>2</sup>                         |

175

176 **SI Table 2**

177 Elk River Watershed cumulative waste rock volumes by mine, reported by Teck Resources in  
 178 their 2022 Implementation Plan Adjustment Document (Table 2.1). <sup>21</sup> Existing volumes are  
 179 values at the end of 2020 in millions of bank (in situ) cubic meters.

| Operation                  | Existing Volume (BCM x 10 <sup>6</sup> ) | Permitted Volume (BCM x 10 <sup>6</sup> ) at the end of mining |
|----------------------------|------------------------------------------|----------------------------------------------------------------|
| Fording River              | 3,036                                    | 4,787                                                          |
| Greenhills                 | 808                                      | 1,186                                                          |
| Line Creek                 | 797                                      | 1,445                                                          |
| Elkview                    | 1,787                                    | 3,304                                                          |
| Coal Mountain <sup>1</sup> | 311                                      | 311                                                            |
| <b>Total</b>               | <b>6,739</b>                             | <b>11,033</b>                                                  |

180 1. No longer operating and currently in a closure period.

Se, NO<sub>3</sub><sup>-</sup>, SO<sub>4</sub><sup>2-</sup> annual estimates of load (optimized for accuracy) for the Elk River (Elk) and Kootenay River (Koot). The proportion that the Elk River contributed by year, from the combined estimates of the two tributaries is shown in percent for each constituent and discharge.<sup>16</sup>

| Year           | Koot Flow (m <sup>3</sup> /sec) | Elk Flow (m <sup>3</sup> /sec) | Elk proportion of total combined (%) | Koot Se (t/Yr) | Elk Se (t/Yr) | Elk proportion of total combined (%) | Koot NO <sub>3</sub> <sup>-</sup> (t/Yr) | Elk NO <sub>3</sub> <sup>-</sup> (t/Yr) | Elk proportion of total combined (%) | Koot SO <sub>4</sub> <sup>2-</sup> (t/Yr) | Elk SO <sub>4</sub> <sup>2-</sup> (t/Yr) | Elk proportion of total combined (%) |
|----------------|---------------------------------|--------------------------------|--------------------------------------|----------------|---------------|--------------------------------------|------------------------------------------|-----------------------------------------|--------------------------------------|-------------------------------------------|------------------------------------------|--------------------------------------|
| 1979           | 128                             | 58.8                           | 31.50%                               |                |               |                                      | 442.77                                   | 218                                     | 33%                                  |                                           |                                          |                                      |
| 1980           | 173                             | 67.3                           | 28.00%                               |                |               |                                      | 557.15                                   | 243                                     | 30%                                  |                                           |                                          |                                      |
| 1981           | 214                             | 90.3                           | 29.70%                               |                |               |                                      | 713.84                                   | 400                                     | 36%                                  |                                           |                                          |                                      |
| 1982           | 189                             | 72.5                           | 27.70%                               |                |               |                                      | 672.67                                   | 350                                     | 34%                                  |                                           |                                          |                                      |
| 1983           | 173                             | 67.8                           | 28.20%                               |                |               |                                      | 581.46                                   | 250                                     | 30%                                  |                                           |                                          |                                      |
| 1984           | 154                             | 60.5                           | 28.20%                               |                |               |                                      | 594.72                                   | 280                                     | 32%                                  |                                           |                                          |                                      |
| 1985           | 142                             | 61.6                           | 30.30%                               |                | 1.66          |                                      | 552.34                                   | 317                                     | 36%                                  | 103186                                    | 32077                                    | 24%                                  |
| 1986           | 188                             | 75.8                           | 28.70%                               |                | 2.22          |                                      | 630.72                                   | 345                                     | 35%                                  | 123833                                    | 41149                                    | 25%                                  |
| 1987           | 154                             | 61.1                           | 28.40%                               |                | 2.04          |                                      | 521.04                                   | 337                                     | 39%                                  | 115952                                    | 38303                                    | 25%                                  |
| 1988           | 139                             | 52.1                           | 27.30%                               |                | 1.63          |                                      | 530.82                                   | 261                                     | 33%                                  | 104826                                    | 32286                                    | 24%                                  |
| 1989           | 166                             | 63.1                           | 27.50%                               |                | 1.86          |                                      | 668.4                                    | 301                                     | 31%                                  | 114991                                    | 37871                                    | 25%                                  |
| 1990           | 204                             | 89.8                           | 30.60%                               |                | 3.57          |                                      | 828.57                                   | 624                                     | 43%                                  | 126769                                    | 46310                                    | 27%                                  |
| 1991           | 238                             | 100.4                          | 29.70%                               |                | 4.09          |                                      | 953.65                                   | 828                                     | 46%                                  | 141380                                    | 54032                                    | 28%                                  |
| 1992           | 143                             | 53.6                           | 27.30%                               |                | 2.2           |                                      | 533.41                                   | 419                                     | 44%                                  | 104216                                    | 38947                                    | 27%                                  |
| 1993           | 159                             | 67.9                           | 29.90%                               |                | 3.12          |                                      | 535.13                                   | 550                                     | 51%                                  | 112542                                    | 43943                                    | 28%                                  |
| 1994           | 158                             | 61.6                           | 28.10%                               |                | 3.23          |                                      | 607.38                                   | 603                                     | 50%                                  | 119986                                    | 44531                                    | 27%                                  |
| 1995           | 171                             | 76.5                           | 30.90%                               |                | 3.69          |                                      | 632.1                                    | 670                                     | 51%                                  | 122786                                    | 48108                                    | 28%                                  |
| 1996           | 228                             | 101                            | 30.70%                               |                | 5.44          |                                      | 813.86                                   | 893                                     | 52%                                  | 153292                                    | 61970                                    | 29%                                  |
| 1997           | 181                             | 80                             | 30.70%                               |                | 4.48          |                                      | 589.91                                   | 612                                     | 51%                                  | 132329                                    | 51921                                    | 28%                                  |
| 1998           | 175                             | 75.9                           | 30.30%                               |                | 4.62          |                                      | 634.14                                   | 805                                     | 56%                                  | 136417                                    | 54786                                    | 29%                                  |
| 1999           | 220                             | 78.7                           | 26.30%                               |                | 4.21          |                                      |                                          | 794                                     |                                      |                                           | 55958                                    |                                      |
| 2000           | 185                             | 70.8                           | 27.70%                               |                | 4.31          |                                      |                                          | 627                                     |                                      |                                           | 55155                                    |                                      |
| 2001           | 108                             | 39.6                           | 26.80%                               |                | 2.49          |                                      |                                          | 356                                     |                                      |                                           | 38955                                    |                                      |
| 2002           | 169                             | 84.3                           | 33.30%                               |                | 5.27          |                                      |                                          | 679                                     |                                      |                                           | 59197                                    |                                      |
| 2003           | 133                             | 64                             | 32.50%                               | 0.49           | 5.22          | 91.50%                               |                                          | 672                                     |                                      |                                           | 58338                                    |                                      |
| 2004           | 148                             | 59.7                           | 28.70%                               | 0.36           | 4.22          | 92.10%                               |                                          | 497                                     |                                      |                                           | 50190                                    |                                      |
| 2005           | 168                             | 77.6                           | 31.60%                               | 0.46           | 6.1           | 93.00%                               |                                          | 811                                     |                                      |                                           | 62462                                    |                                      |
| 2006           | 187                             | 87.8                           | 32.00%                               | 0.49           | 7.83          | 94.20%                               |                                          | 1214                                    |                                      |                                           | 73056                                    |                                      |
| 2007           | 203                             | 82.2                           | 28.80%                               | 0.56           | 7.78          | 93.30%                               |                                          | 1115                                    |                                      |                                           | 69321                                    |                                      |
| 2008           | 160                             | 67.2                           | 29.60%                               | 0.4            | 6.88          | 94.50%                               |                                          | 1153                                    |                                      |                                           | 63140                                    |                                      |
| 2009           | 139                             | 49.7                           | 26.30%                               | 0.4            | 5.54          | 93.30%                               | 414.02                                   | 899                                     | 68%                                  |                                           | 50131                                    |                                      |
| 2010           | 138                             | 55.6                           | 28.70%                               | 0.38           | 6.05          | 94.10%                               | 427.55                                   | 1104                                    | 72%                                  |                                           | 54625                                    |                                      |
| 2011           | 204                             | 80.8                           | 28.40%                               | 0.5            | 8.48          | 94.40%                               | 596.62                                   | 1633                                    | 73%                                  |                                           | 66141                                    |                                      |
| 2012           | 238                             | 100.1                          | 29.60%                               | 0.58           | 11.53         | 95.20%                               | 712.9                                    | 2139                                    | 75%                                  |                                           | 79029                                    |                                      |
| 2013           | 212                             | 98.9                           | 31.80%                               | 0.49           | 12.6          | 96.20%                               | 657.21                                   | 2645                                    | 80%                                  | 135270                                    | 88804                                    | 40%                                  |
| 2014           | 192                             | 86.6                           | 31.10%                               | 0.44           | 12.4          | 96.60%                               | 589.34                                   | 2815                                    | 83%                                  | 128185                                    | 85490                                    | 40%                                  |
| 2015           | 152                             | 63.6                           | 29.50%                               | 0.35           | 9.99          | 96.60%                               | 494.69                                   | 2038                                    | 80%                                  | 117210                                    | 74140                                    | 39%                                  |
| 2016           | 162                             | 60.9                           | 27.30%                               | 0.42           | 9.12          | 95.60%                               | 539.4                                    | 2031                                    | 79%                                  | 127970                                    | 76617                                    | 37%                                  |
| 2017           | 210                             | 80.5                           | 27.70%                               | 0.51           | 9.96          | 95.20%                               | 848.21                                   | 2115                                    | 71%                                  | 146569                                    | 79502                                    | 35%                                  |
| 2018           | 179                             | 70.3                           | 28.20%                               | 0.45           | 10.21         | 95.80%                               | 595.46                                   | 2169                                    | 78%                                  | 131452                                    | 84313                                    | 39%                                  |
| 2019           | 144                             | 51.6                           | 26.40%                               | 0.37           | 7.88          | 95.50%                               | 460.4                                    | 1448                                    | 76%                                  | 124535                                    | 64884                                    | 34%                                  |
| 2020           |                                 | 74.6                           |                                      |                | 10.5          |                                      |                                          | 2198                                    |                                      |                                           | 80595                                    |                                      |
| 2021           |                                 | 74                             |                                      |                | 11.36         |                                      |                                          | 2501                                    |                                      |                                           | 82322                                    |                                      |
| 2022           |                                 | 87.8                           |                                      |                | 12.27         |                                      |                                          | 2549                                    |                                      |                                           | 89262                                    |                                      |
| Mean           | 174                             | 72                             | 29.20%                               | 0.45           | 5.77          | 94.50%                               | 615                                      | 1034                                    | 58%                                  | 124938                                    | 4.5E+07                                  | 30%                                  |
| Mean Post 2009 | 179                             | 74                             | 28.60%                               | 0.44           | 9.85          | 95.30%                               | 576                                      | 2020                                    | 76%                                  | 130170                                    | 74353                                    | 38%                                  |

182 **SI Table 4**  
 183 Selenium and Nitrate treatment, locations, timing, and volumetric capacity as presented in the  
 184 2022 Teck Implementation Plan Adjustment.<sup>21</sup> Pilot phase start dates sourced from mass  
 185 removal data provided by Teck.<sup>6</sup> Note, from pilot phase start to the operational date, treatment  
 186 facilities did not operate continuously and additional treatment pilot projects occurred before  
 187 2015.

188

| <b>Water Treatment Facility</b>          | <b>Facility Type</b>          | <b>Pilot Phase Start</b> | <b>Operational Date</b> | <b>Hydraulic Capacity (m<sup>3</sup>/day)</b> |
|------------------------------------------|-------------------------------|--------------------------|-------------------------|-----------------------------------------------|
| Line Creek Operation WLC Phase I         | Active Water Treatment        | October 25, 2015         | December 31, 2018       | 6,000                                         |
| Line Creek Operation WLC Phase II        | Active Water Treatment        | NA                       | January 1, 2020         | 1,500                                         |
| Elkview Operation SRF Phase I            | Saturated Rock Fill Treatment | January 1, 2018          | September 1, 2021       | 20,000                                        |
| Fording River Operation AWTF (FRO-South) | Active Water Treatment        | December 22, 2021        | September 1, 2022       | 20,000                                        |

189

190 SI Figure 2  
191 Map illustrating Canadian Water Survey of Canada discharge monitoring stations (halo symbols) and  
192 water quality sampling locations (triangles) for both the Elk (orange) and Kootenay (blue) Rivers.

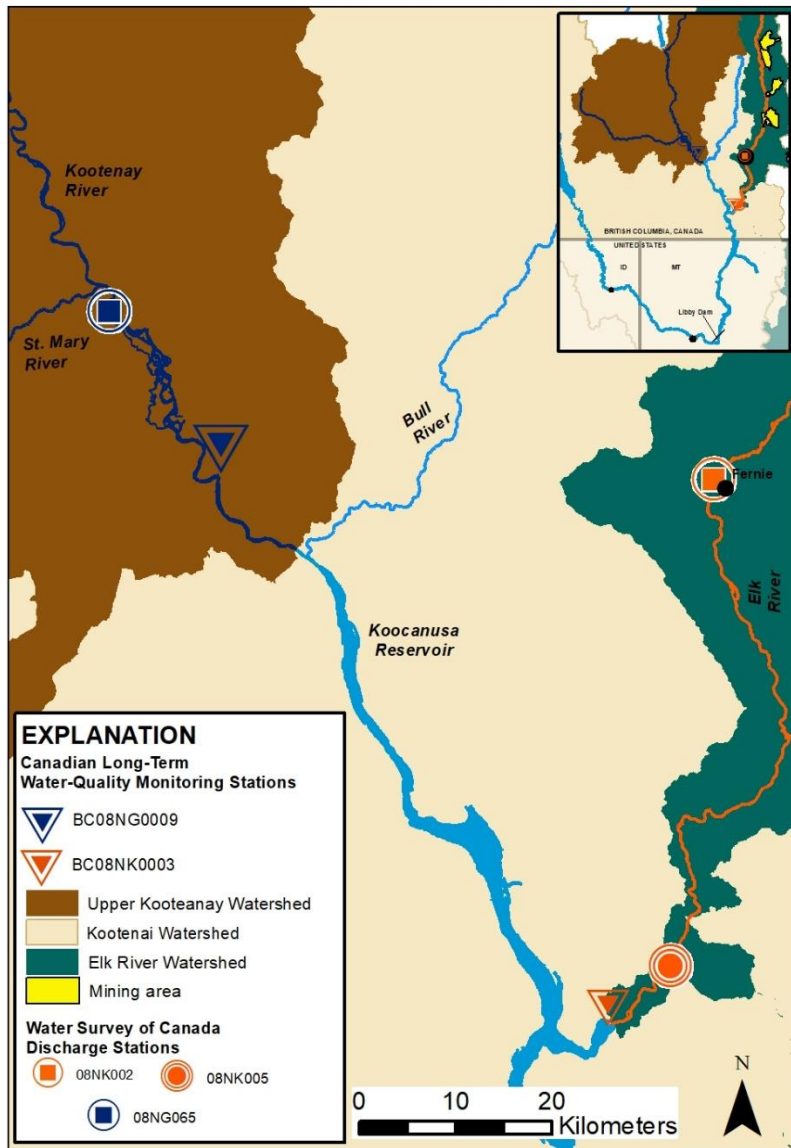

193 SI Figure 3  
194 Mean daily hydrographs for the Elk River at Hwy 93 (top) and Kootenay River at Fenwick  
195 (bottom)<sup>22</sup>, discharge in m<sup>3</sup>/sec. Two time periods are shown one from 1977-2000 and from  
196 2000-2022.

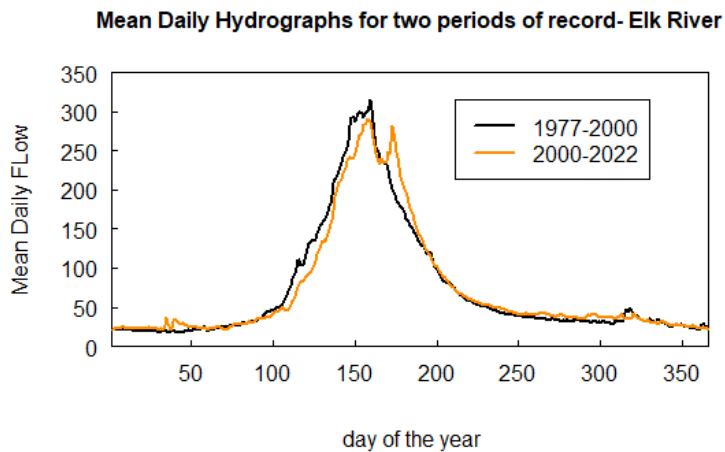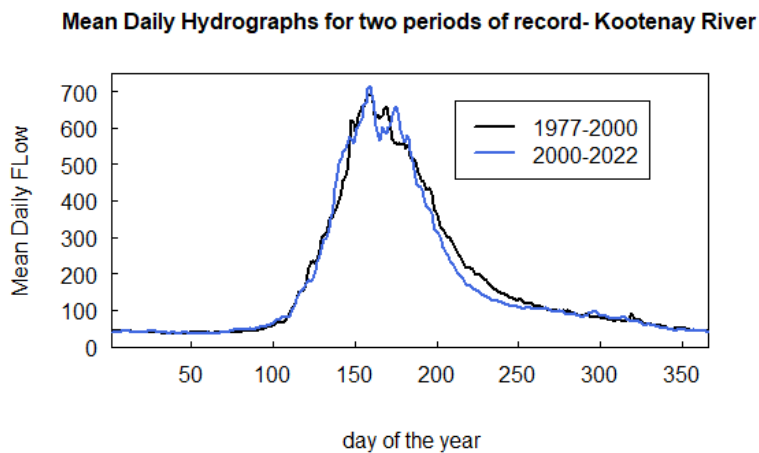

197

198



199 SI Figure 4  
200 Box plot illustrating the range of discharge on days with water quality sampling vs those without water  
201 quality samples for Se in the Elk River at Highway 93.

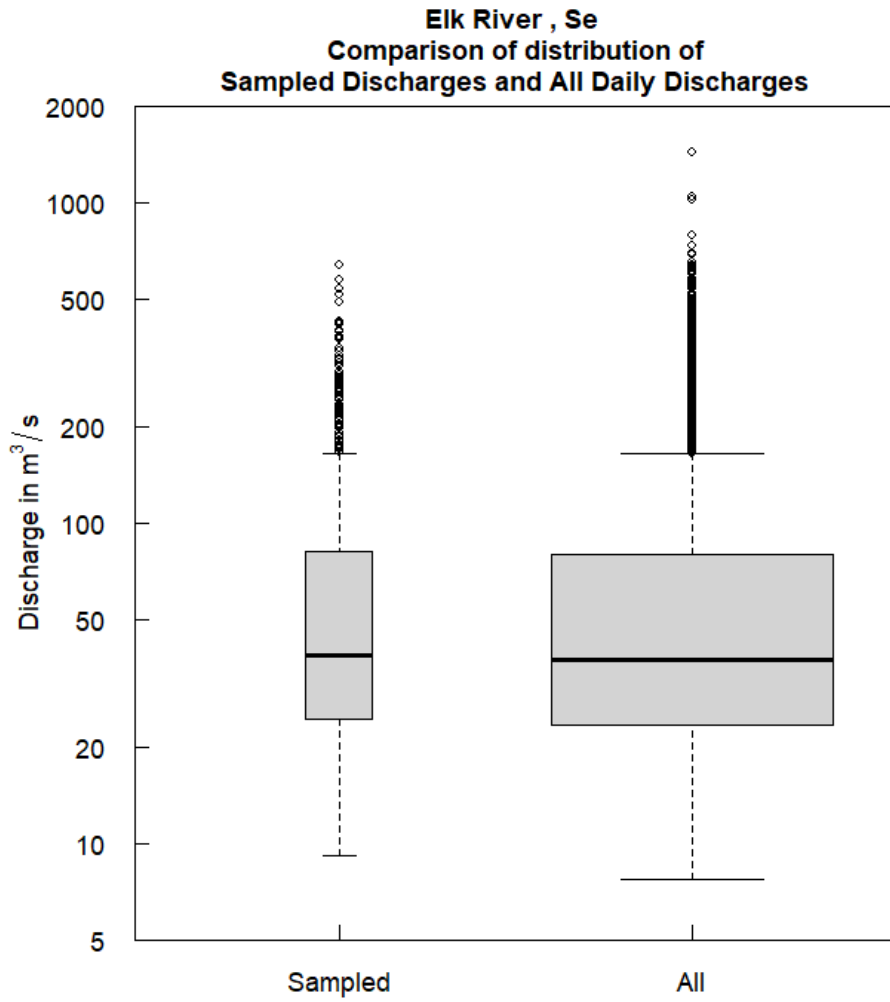

202

203 SI Figure 5  
 204 Elk River at Highway 93, flow record from 1979-2021.<sup>6</sup> Plots showing 8 different statistical  
 205 flow metrics, with the Mann-Kendall trend test and corresponding Theil-Sen slope estimate to  
 206 evaluate flow stationarity. The Theil-Sen slope provides an estimate of the direction and  
 207 magnitude of the Mann-Kendall trend.<sup>23</sup>

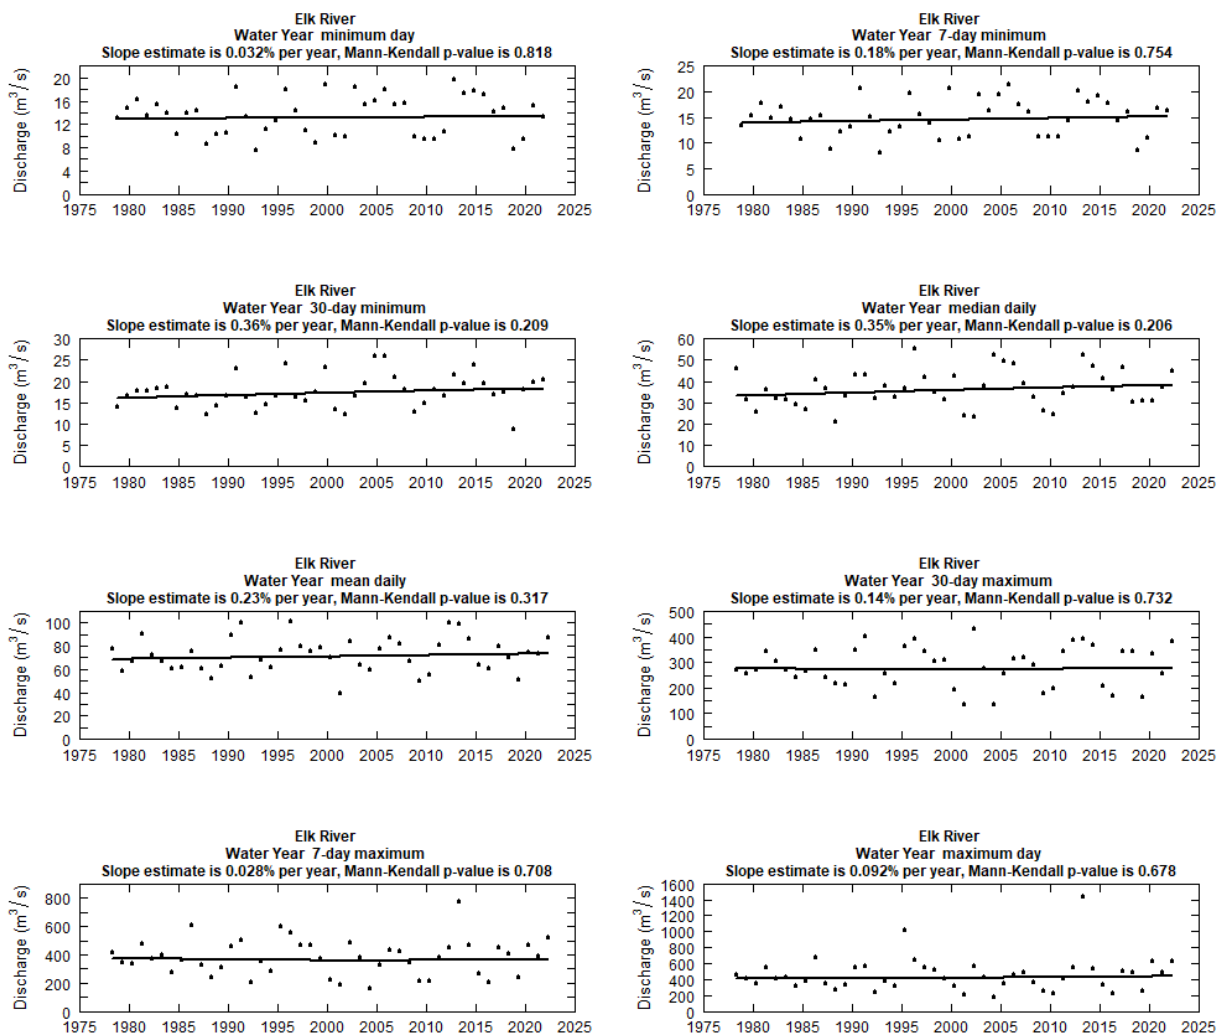

208

209 SI Figure 6  
 210 Kootenay River at Fenwick, flow record from 1979-2019.<sup>6</sup> Plots showing 8 different statistical  
 211 flow metrics, and the Mann-Kendall trend test and corresponding Theil-Sen slope estimate to  
 212 evaluate flow stationarity. The Theil-Sen slope provides an estimate of the direction and  
 213 magnitude of the Mann-Kendall trend.<sup>23</sup>

214

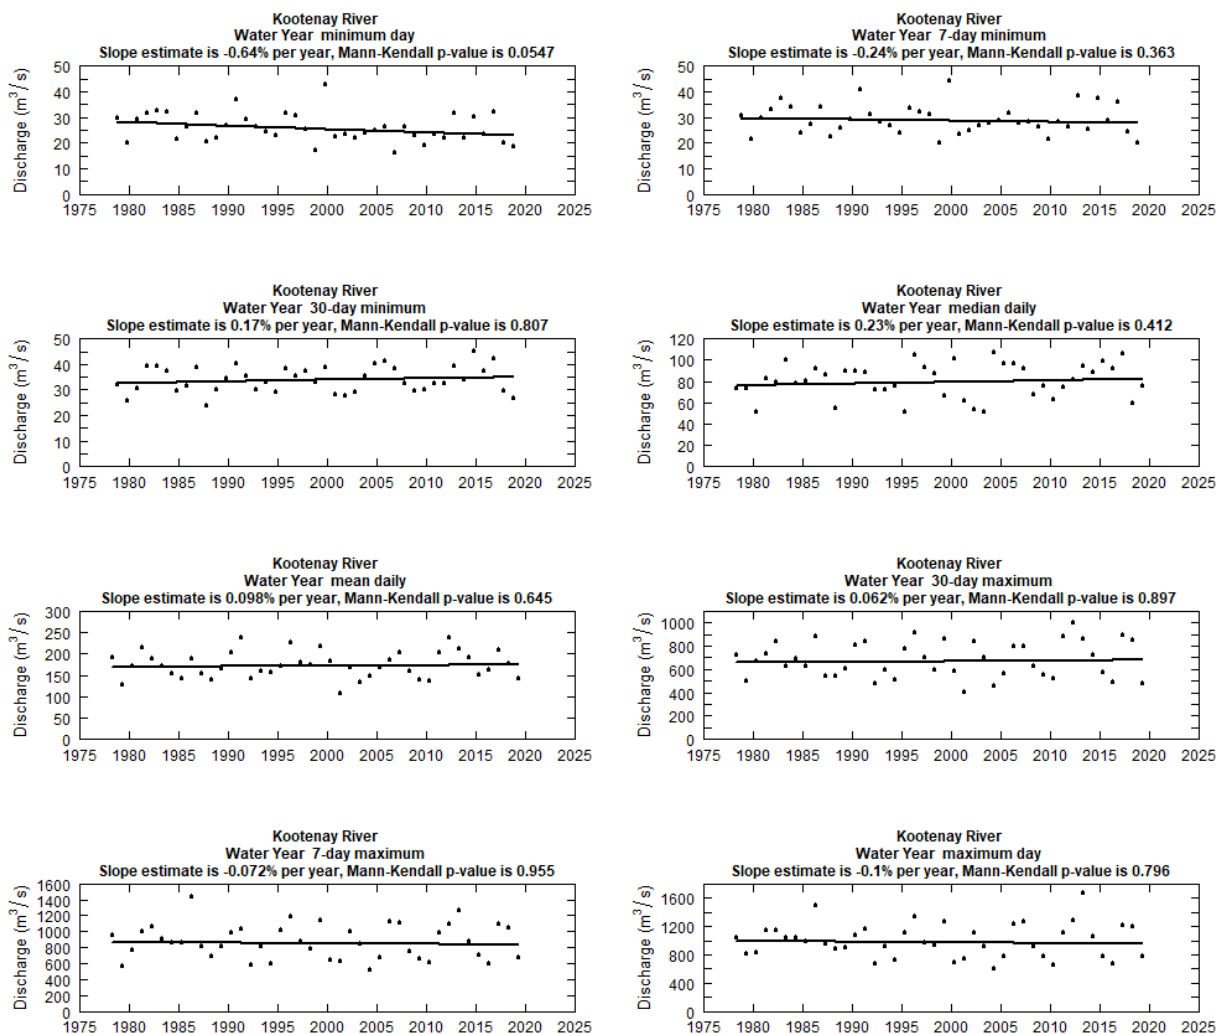

215

216 SI Figure 7

217 Streamflow trends for the Elk River at Highway 93 (top two panels) and the Kootenay River at  
218 Fenwick (bottom two panels). Left panels are Quantile-Kendall plots for the water year. Right are  
219 Quantile-Kendall plots for the low flow period (February-October). Quantile-Kendall plots are  
220 visualizations of trends in slope for ranked discharge, where each point is a trend slope for a given  
221 order statistic, the lowest daily discharge is on the left and the highest is on the right.<sup>24</sup>

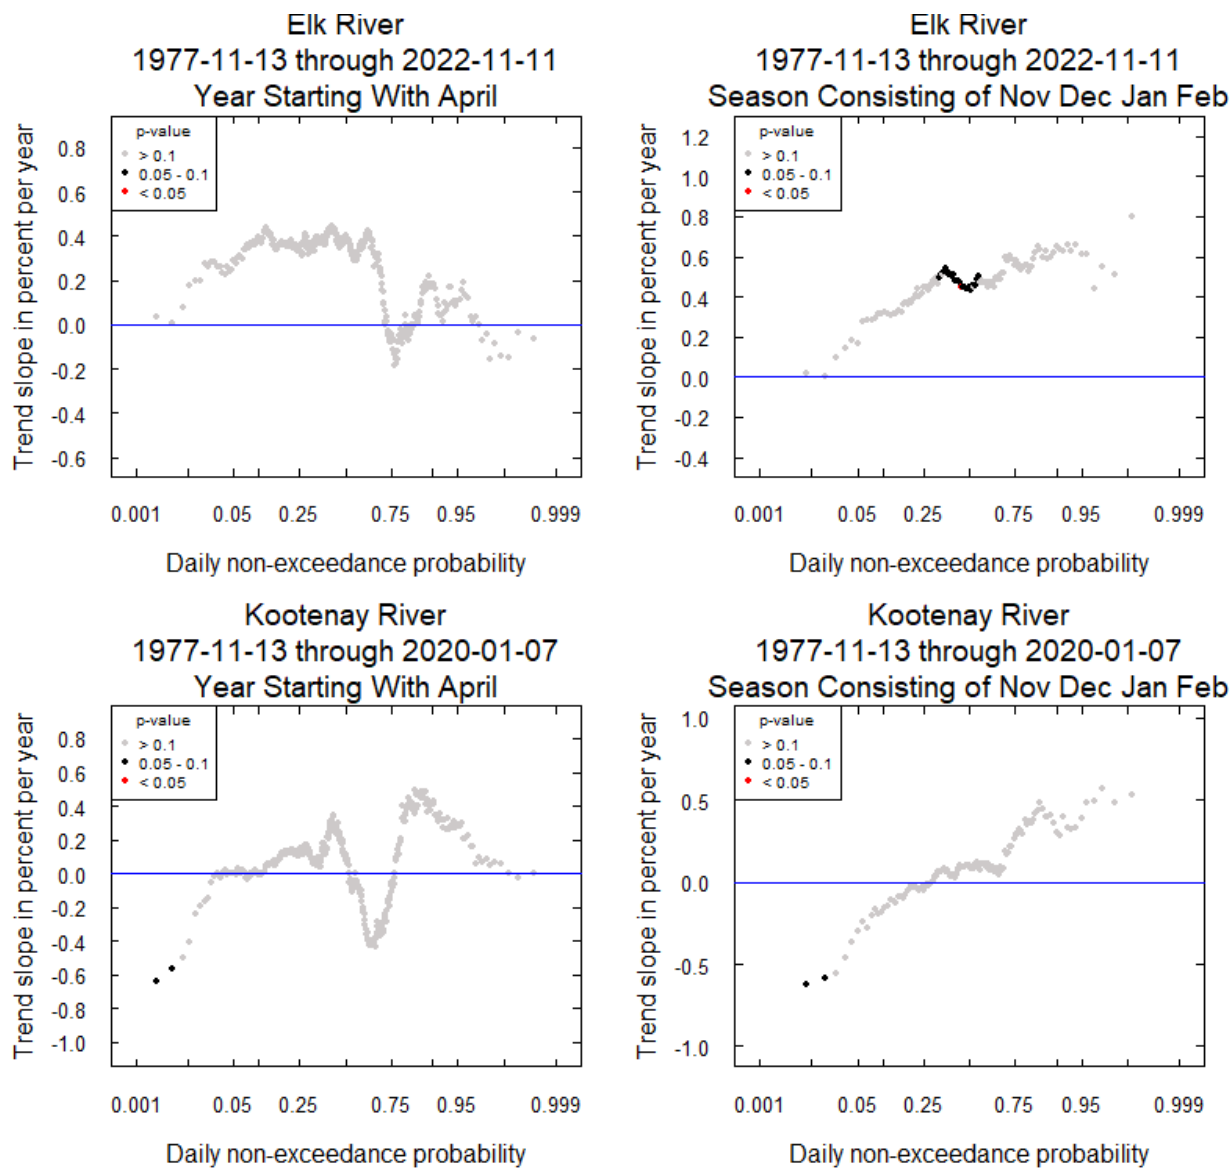

222

223

224

225 **SI Figure 8**

226 Plot illustrating the difference between observed daily loads on the days when samples were collected vs modeled daily load on the same day  
227 for Se in the Elk River at Highway 93. Open circles are generated values that represent censored (below detection limit) values. Equivalent R-  
228 squared value for this model (error in the estimates of  $\log(\text{Flux})$ ) is 0.852. 20 of the 841 samples were below the detection limit. Models are  
229 available in Lange and Storb, 2023.<sup>6</sup>

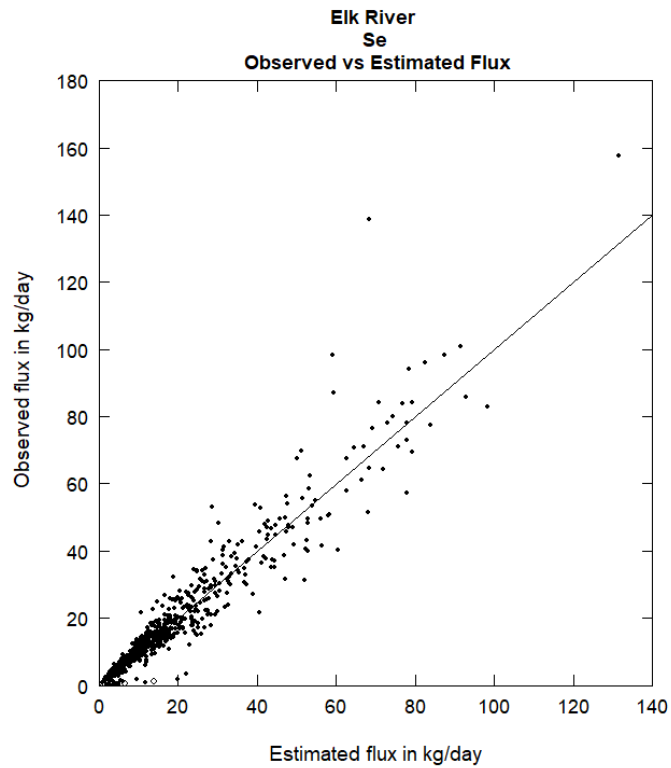

230

231 SI Figure 9

232 Two plots illustrating the difference between WRTDS and WRTDS\_kalman models for Se in the Elk River at Highway 93. Models are available in  
233 Lange and Storb, 2023.<sup>6</sup>

234

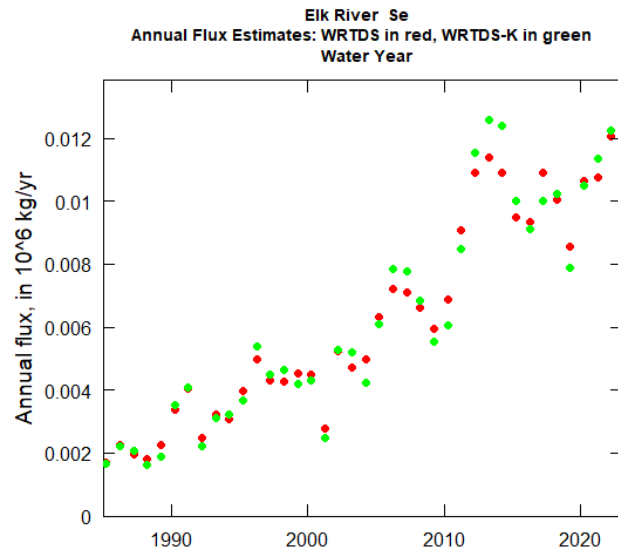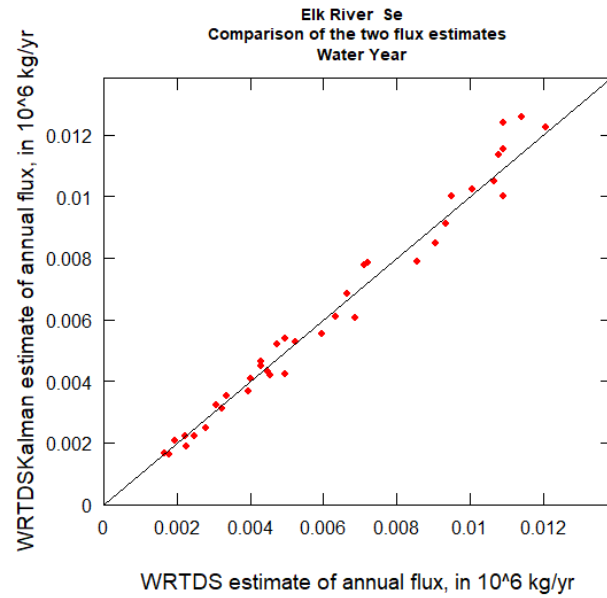

235 SI Figure 10

236 Weighted Regression based on Time Discharge and Season (WRTDS) modeled 3-D surfaces for Se, NO<sub>3</sub><sup>-</sup>, SO<sub>4</sub><sup>2-</sup> for the Elk River at  
237 Highway 93 and the Kootenay River at Fenwick. Plots illustrate and quantify the relationship between concentration and discharge  
238 over time for each WRTDS model. Left plots are the three solutes for the Elk River at Highway 93 and Right plots are the three  
239 solutes for the Kootenay River at Fenwick. Top row of plots is Se, middle is NO<sub>3</sub><sup>-</sup>, bottom row is SO<sub>4</sub><sup>2-</sup>. The color ramp represents  
240 concentration of the respective constituent in mg/l. Models are available in Lange and Storb, 2023.<sup>6</sup>

241

242

243

244

245

246

247

248

249

250

251

252

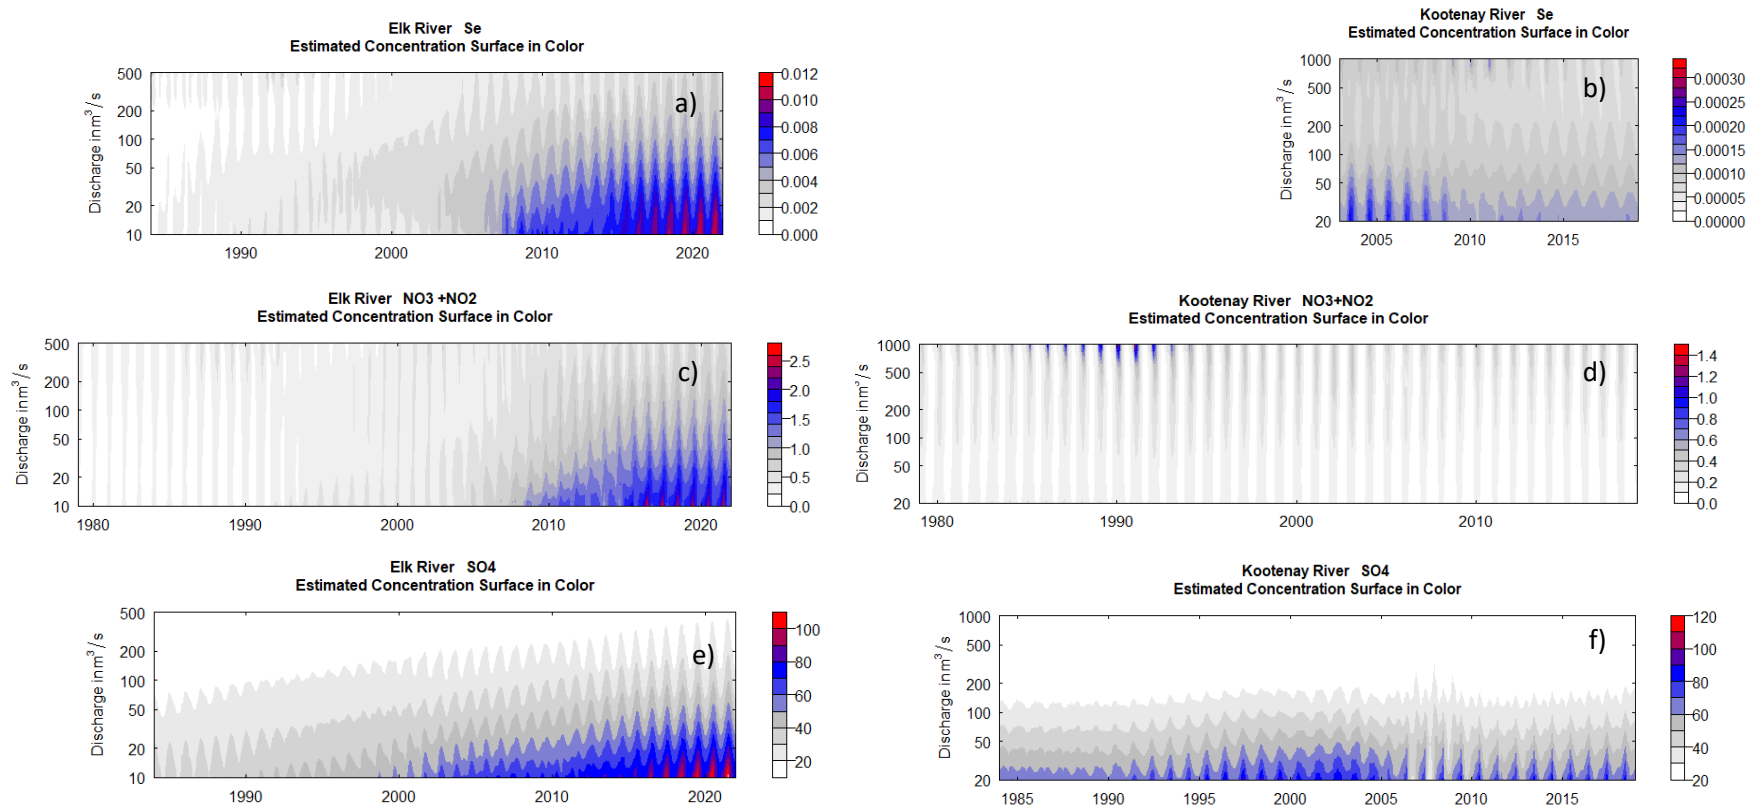

SI Figure 11

Modeled concentration vs discharge relationships. Top row (a-c) is the Kootenay River at Fenwick, the bottom row is the Elk River at Highway 93 (d-e). Each column is a solute, from left to right (Se; a & d,  $\text{NO}_3^-$ : b & e,  $\text{SO}_4^{2-}$ ; c & f). Each line is a different date. These plots are focused on high flow times of the year (June 13) over time. Low flow times (ex. January 1) exhibit similar patterns but are not shown. Models are available in Lange and Storb, 2023.<sup>6</sup>

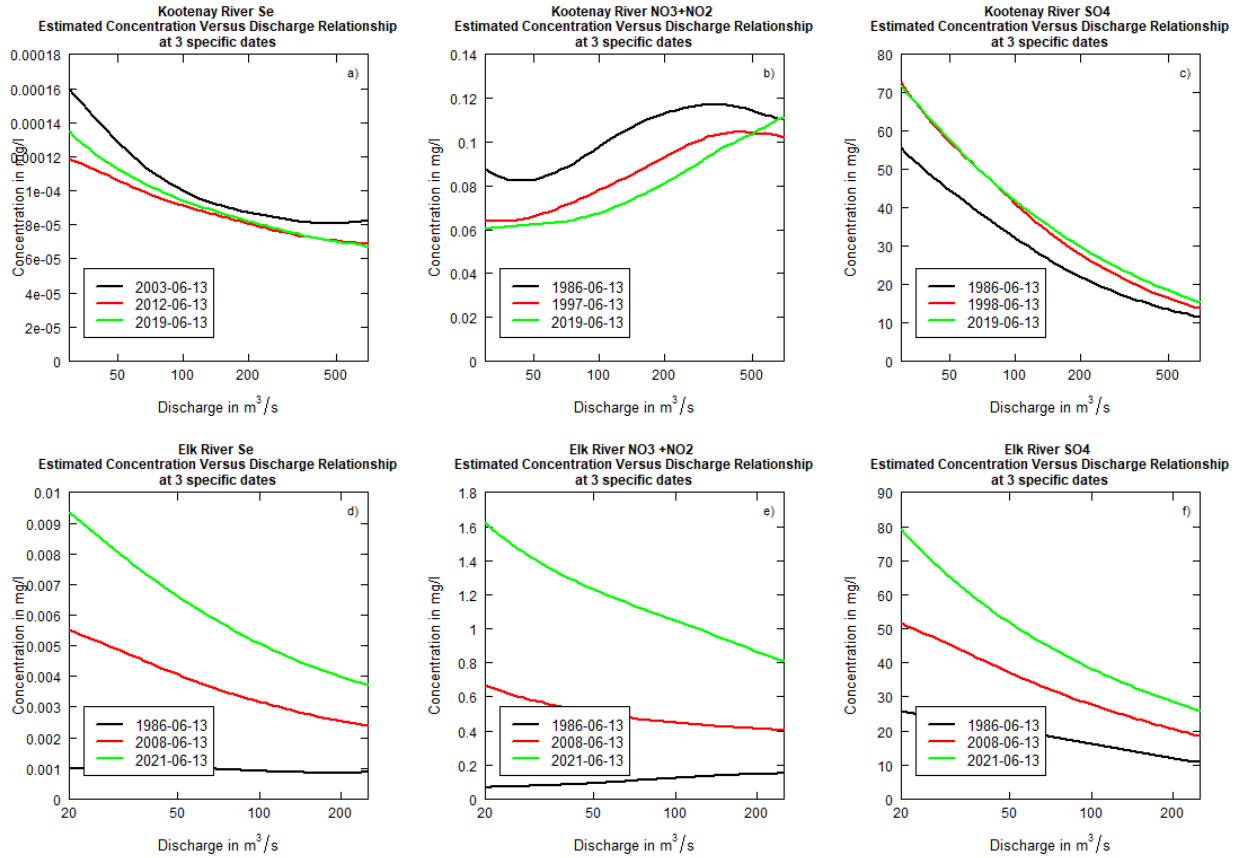



SI Figure 12

Changes in concentration over time at different discharges and times of the year for the Elk River at Highway 93. The left column (a-c-e.) is high discharge time of year (June 13) and the right column (b-d-f.) is a low discharge time of year (Jan 1). Discharge lines roughly represent the 5th, 50th, and 95th percentiles for flow duration curves for 60 days around (30 days before and after) each date. Models are available in Lange and Storb, 2023.<sup>6</sup>

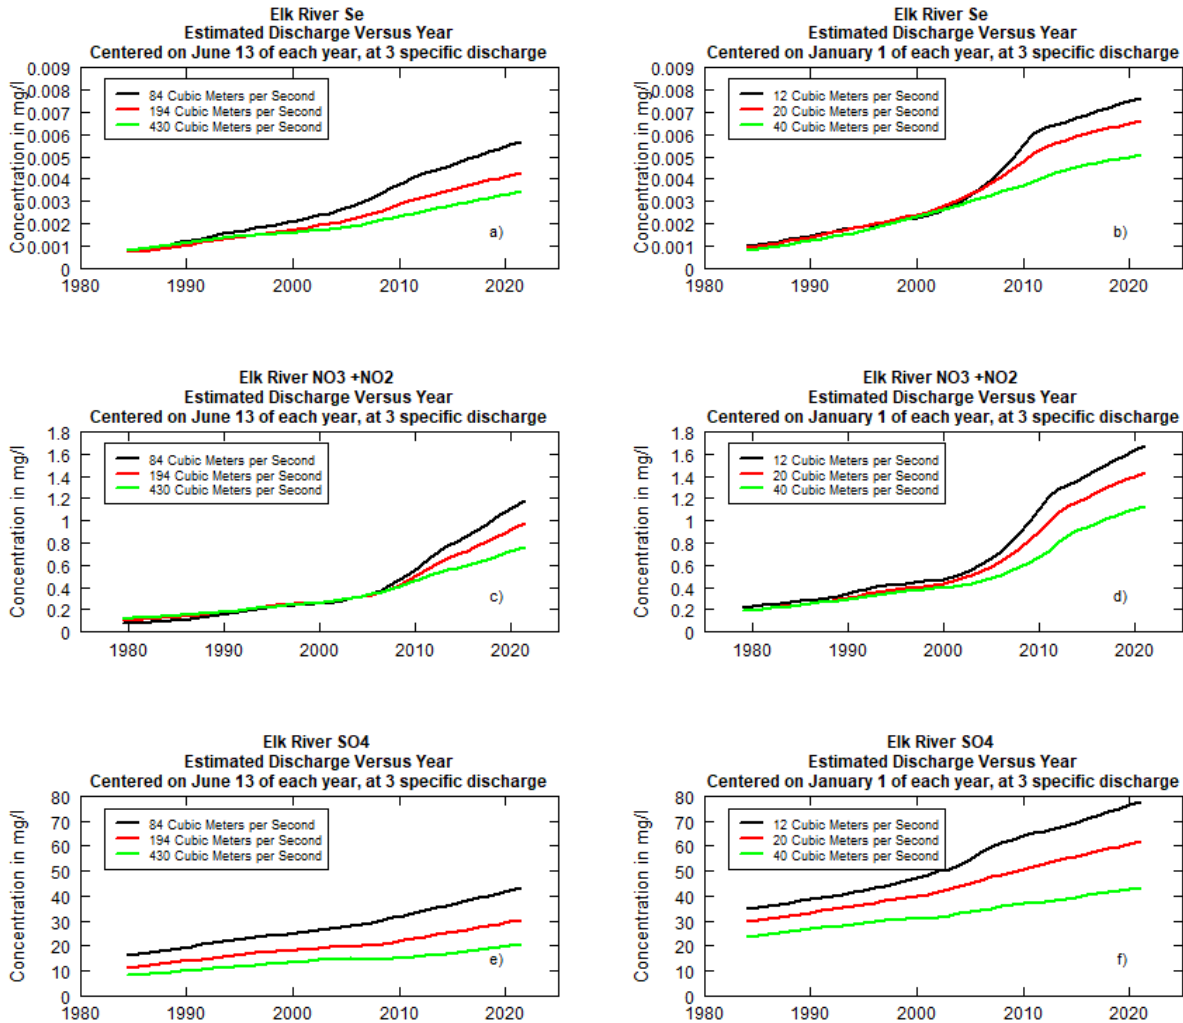

### SI Figure 13

Additional perspective on Elk River Mine water treatment. a.) Estimated percentage reduction in concentration due to treatment. Reductions range from 0% to 40%. b.) Boxplots of estimated daily concentrations of Se during the high discharge months of May, June, and July. First box is for water years 2006-2015, second is 2016 – 2022, and the third is also for 2016-2022 but simulated as if there had been no treatment upstream. [the medians of the three boxes shown are 0.0032, 0.0042, 0.0045]. c.) Boxplots of estimated daily concentrations of Se during the low discharge months of August through April. First box is for water years 2006-2015, second is 2016 – 2022, and the third is also for 2016-2022 but simulated as if there had been no treatment upstream [the medians of the three boxes shown are 0.0049, 0.0062, 0.0075].

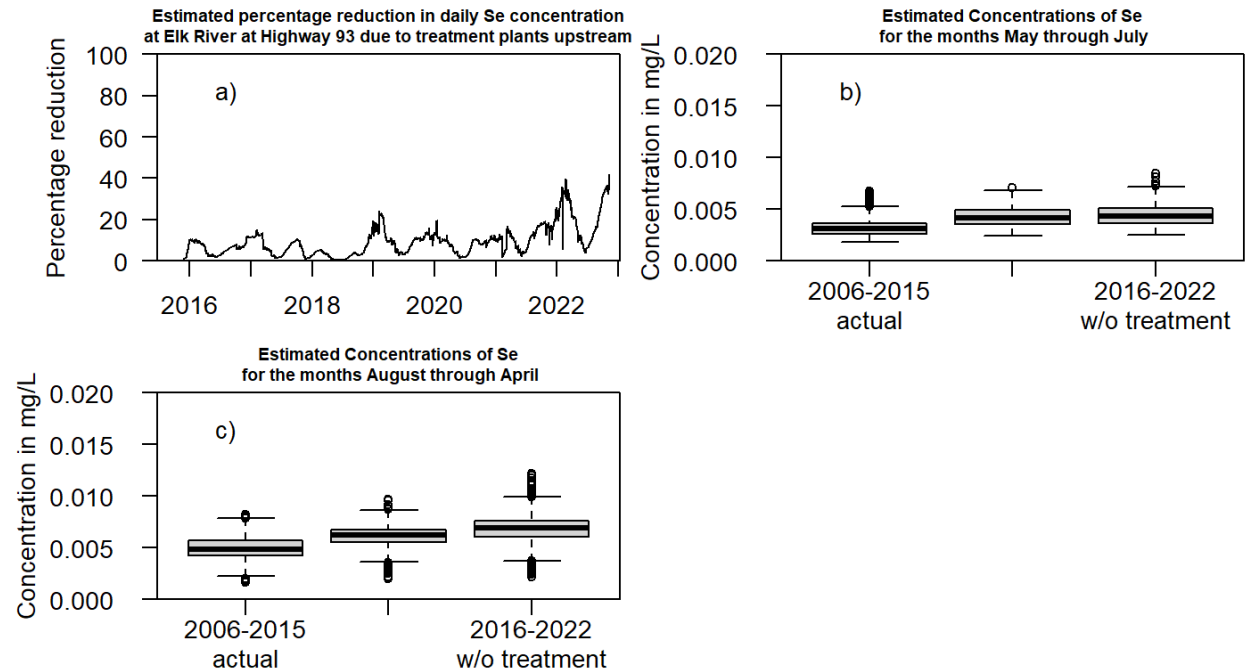

## Supporting Information References

- (1) Copernicus Sentinel data processed by European Space Agency. (accessed January 18, 2023).
- (2) Gorelick, N.; Hancher, M.; Dixon, M.; Ilyushchenko, S.; Thau, D.; Moore, R. Google Earth Engine: Planetary-scale geospatial analysis for everyone. *Remote Sensing of Environment* **2017**, *202*, 18-27. DOI: 10.1016/j.rse.2017.06.031.
- (3) Rodriguez-Galiano, V. F.; Ghimire, B.; Rogan, J.; Chica-Olmo, M.; Rigol-Sanchez, J. P. An assessment of the effectiveness of a random forest classifier for land-cover classification. *ISPRS Journal of Photogrammetry and Remote Sensing* **2012**, *67*, 93-104. DOI: 10.1016/j.isprsjprs.2011.11.002.
- (4) *ArcGIS Desktop*; Redlands, CA, 2013. (accessed June 22, 2023).
- (5) British Columbia Ministry of Forests Lands Natural Resource Operations and Rural Development. *BC Water Tool - Watershed*. 2023. <https://kwt.bcwatertool.ca/watershed> (accessed February 9, 2023).
- (6) Lange, D. A.; Storb, M. B. *Input files and WRTDS model output for the two major tributaries of Lake Koochanusa*; 2023. (accessed June 2023). DOI: 10.5066/P9JP8VGL.
- (7) Granato, G. E. *Computer programs for obtaining and analyzing daily mean streamflow data from the U.S. Geological Survey National Water Information System web site*; 2009. DOI: 10.3133/ofr20081362.
- (8) Medalie, L. *Effects of urban best management practices on streamflow and phosphorus and suspended-sediment transport on Englesby Brook in Burlington, Vermont, 2000-2010*; Reston, VA, 2012. DOI: 10.3133/sir20125103.
- (9) Lorenz, D. L. *smwrBase—An R package for managing hydrologic data, version 1.1.1*; Reston, VA, 2015. (accessed May 8, 2023). DOI: 10.3133/ofr20151202.
- (10) Katay, F. *Exploration and mining in the Kootenay-Boundary Region, British Columbia*. In: *Exploration and Mining in British Columbia, 2014*; Information Circular 2015-2; British Columbia Ministry of Energy and Mines, British Columbia Geological Survey, 2015. [https://cmscontent.nrs.gov.bc.ca/geoscience/publicationcatalogue/InformationCircular/BCGS\\_IC\\_2016-01-03.pdf](https://cmscontent.nrs.gov.bc.ca/geoscience/publicationcatalogue/InformationCircular/BCGS_IC_2016-01-03.pdf) (accessed February 9, 2023).

(11) Goodarzi, F.; Grieve, D. A.; Sanei, H.; Gentzis, T.; Goodarzi, N. N. Geochemistry of coals from the Elk Valley coalfield, British Columbia, Canada. *International Journal of Coal Geology* **2009**, 77 (3), 246-259. DOI: 10.1016/j.coal.2008.08.010.

(12) Wellen, C.; Shatilla, N. J.; Carey, S. K. The influence of mining on hydrology and solute transport in the Elk Valley, British Columbia, Canada. *Environmental Research Letters* **2018**, 13 (7), 074012. DOI: 10.1088/1748-9326/aaca9d.

(13) British Columbia Forest Analysis and Inventory Branch. *Reconnaissance karst potential mapping*; 2023. <https://catalogue.data.gov.bc.ca/dataset/reconnaissance-karst-potential-mapping> (accessed May 10, 2023).

(14) Lussier, C.; Veiga, V.; Baldwin, S. The geochemistry of selenium associated with coal waste in the Elk River Valley, Canada. *Environmental Geology* **2003**, 44 (8), 905-913. DOI: 10.1007/s00254-003-0833-y.

(15) Teck Resources Limited. *Sullivan Mine*. 2023. <https://www.teck.com/operations/canada/legacy/sullivan-mine/> (accessed June 6, 2023).

(16) Hirsch, R. M.; Moyer, D. L.; Archfield, S. A. Weighted Regressions on Time, Discharge, and Season (WRTDS), with an application to Chesapeake Bay River inputs. *Journal of the American Water Resources Association* **2010**, 46 (5), 857-880. DOI: 10.1111/j.1752-1688.2010.00482.x.

(17) Hirsch, R. M.; Archfield, S. A.; De Cicco, L. A. A bootstrap method for estimating uncertainty of water quality trends. *Environmental Modelling & Software* **2015**, 73, 148-166. DOI: 10.1016/j.envsoft.2015.07.017.

(18) Hirsch, R. M.; De Cicco, L. A. *User guide to Exploration and Graphics for RivEr Trends (EGRET) and dataRetrieval: R packages for hydrologic data: U.S. Geological Survey Techniques and Methods 4-A10*; Reston, VA, 2015. (accessed February 9, 2023). DOI: 10.3133/tm4A10.

(19) Zhang, Q.; Hirsch, R. M. River water-quality concentration and flux estimation can be improved by accounting for serial correlation through an autoregressive model. *Water Resources Research* **2019**, 55 (11), 9705-9723. DOI: 10.1029/2019WR025338.

(20) Lee, C. J.; Hirsch, R. M.; Crawford, C. G. *An evaluation of methods for computing annual water-quality loads: U.S. Geological Survey Scientific Investigations Report 2019-5084*; Reston, VA, 2019. (accessed February 9, 2023). DOI: 10.3133/sir20195084.

(21) Teck Resources Limited. *Elk Valley water quality plan: 2022 implementation plan adjustment*; 2022. [https://www.teck.com/media/EVWQP\\_2022\\_ImplementationPlanAdjustment\\_Main\\_Report.pdf](https://www.teck.com/media/EVWQP_2022_ImplementationPlanAdjustment_Main_Report.pdf) (accessed January 9, 2023).

(22) British Columbia Ministry of Forests Lands Natural Resource Operations and Rural Development. *B.C. Water Tool - Streamflow & Water Levels*. 2023. <https://kwt.bcwatertool.ca/streamflow> (accessed June 6, 2023).

(23) Helsel, D. R.; Hirsch, R. M.; Ryberg, K. R.; Archfield, S. A.; Gilroy, E. J. *Statistical methods in water resources*; Reston, VA, 2020. (accessed February 13, 2023). DOI: 10.3133/tm4A3.

(24) U.S. Geological Survey. *Daily Streamflow and Trend Analysis*. 2023. [https://doi-usgs.github.io/EGRET/articles/streamflow\\_trend.html#the-quantile-kendall-plot](https://doi-usgs.github.io/EGRET/articles/streamflow_trend.html#the-quantile-kendall-plot) (accessed February 9, 2023).
